# Supplementary material for: Somatic Trp53 mutations differentially drive breast cancer and evolution of metastases
Source: PubMed Central journal article supplement (PMC6160420; doi:10.1038/s41467-018-06146-9), 2018-09-27
Supplement: 41467_2018_6146_MOESM1_ESM.pdf [file 41467_2018_6146_MOESM1_ESM.pdf]

**Somatic *Trp53* mutations differentially drive breast cancer and evolution of metastases**

Zhang and Xiong et al.

# Supplementary Figure 1

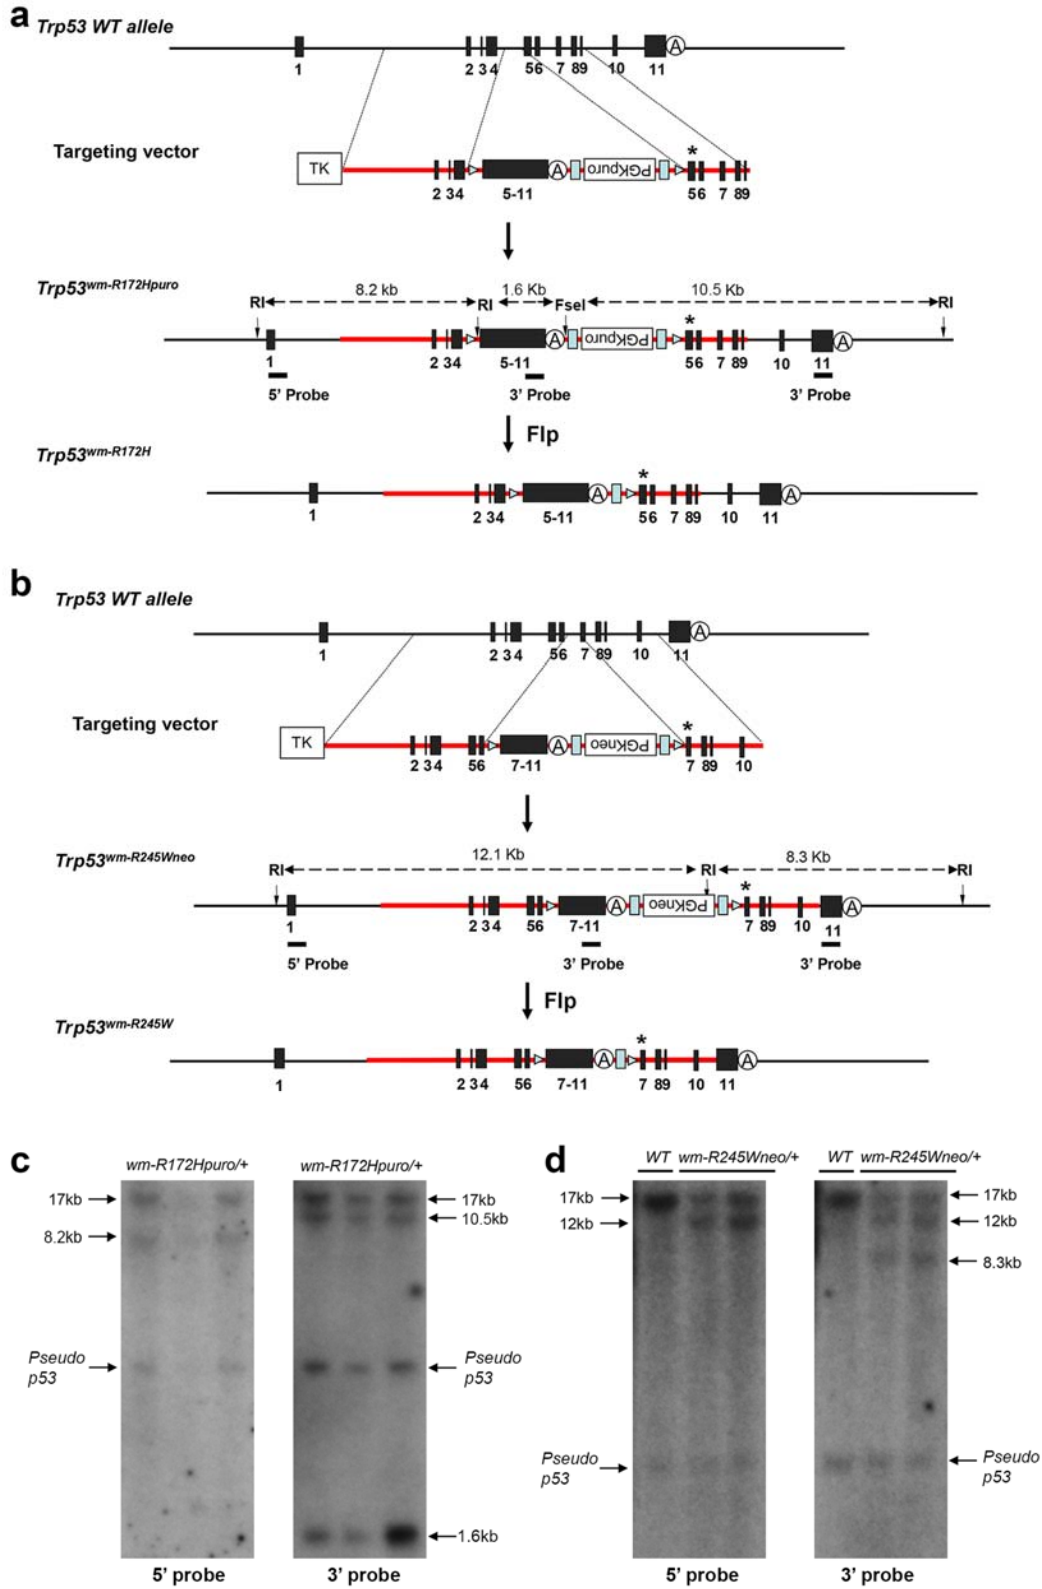

**Supplementary Figure 1** Knockin strategy and confirmation of the proper targeting of the endogenous *Trp53* alleles

- a. The *flp-Frt*-mediated strategy was used to generate the knockin *Trp53<sup>wm-R172H</sup>* allele. Two *loxPs* (blue triangles) flanking cDNA fragment for *Trp53* exon 5-11 and the *puromycin (puro)* resistance gene flanked by *Frt* sites (blue boxes) were inserted in intron 4 of mouse *Trp53* gene. In addition, 515G->C mutation (asterisk) was introduced in the following exon 5. The resulting mice were mated with CMV-*flp*-expressing mice to delete *puro*. The final product is the *Trp53<sup>wm-R172H</sup>* allele with a *loxP* flanked *Trp53* exon 5-11 cDNA and a single *Frt* site in intron 4, followed by a single substitution at nucleotide 515. Ⓐ *Trp53* native polyadenylation signaling sequence.
- b. The *flp-Frt*-mediated strategy was used to generate the knockin *Trp53<sup>wm-R245W</sup>* allele. Two *loxPs* (blue triangles) flanked cDNA fragment for *Trp53* exon 7-11 and the *neomycin (neo)* resistance gene flanked by *Frt* sites (blue boxes) were inserted in intron 6 of mouse *Trp53* gene. In addition, 733C->T and 735C->G mutations (asterisks) were introduced in exon 7. The resulting mice were mated with CMV-*flp*-expressing mice to delete *neo*. The final product is the *Trp53<sup>wm-R245W</sup>* allele with a *loxP* flanked *Trp53* exon 7-11 cDNA and a single *Frt* site in intron 6, followed by substitutions at nucleotides 733 and 735. Ⓐ *Trp53* native polyadenylation signaling sequence.
- c. Southern blot analysis was performed to confirm the proper targeting of the endogenous *Trp53<sup>wm-R172H</sup>* allele. The banding patterns for 5' and 3' probes after digesting the mouse genomic DNA with EcoRI (RI) and FseI are shown.
- d. Southern blot analysis was performed to confirm the proper targeting of the endogenous *Trp53<sup>wm-R245W</sup>* allele. The banding patterns for 5' and 3' probes after digesting the mouse genomic DNA with EcoRI (RI) are shown.

## Supplementary Figure 2

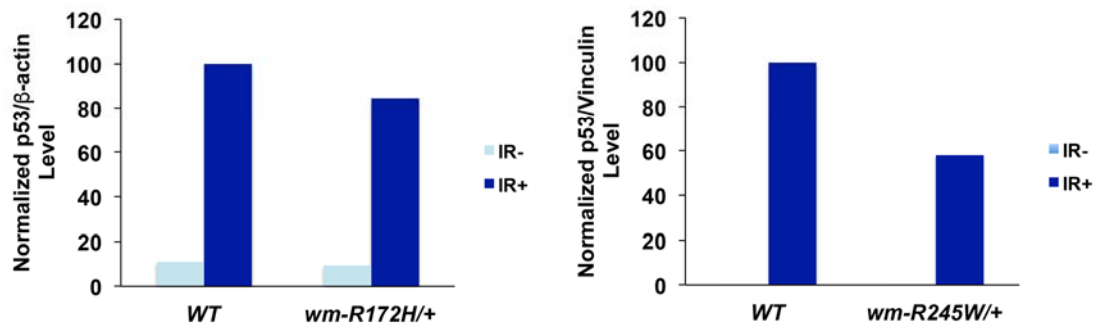

**Supplementary Figure 2** Quantification of Western blot analysis for Trp53 protein levels in thymuses of various *Trp53* genotypes (*WT*, *wm-R172H/+* and *wm-R245W/+*). IR,  $\gamma$ -radiation.

### Supplementary Figure 3

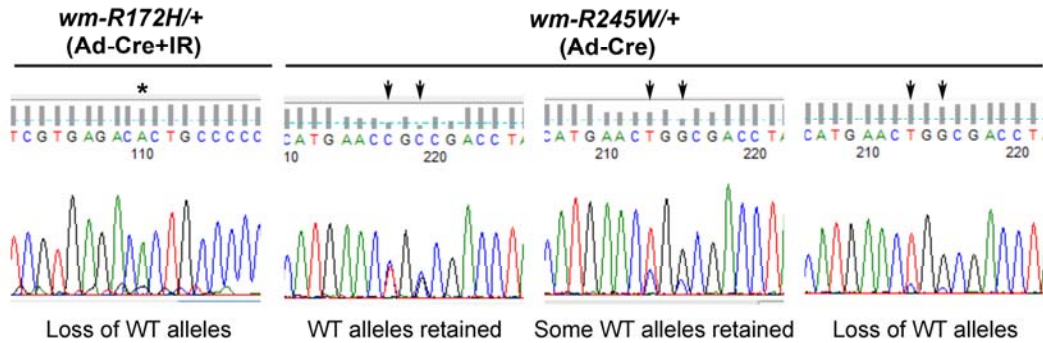

**Supplementary Figure 3** Representative DNA chromatograms showing status of the *Trp53* WT allele in mammary tumors from Ad-Cre injected mice with different *Trp53* genotypes as shown. Loss of WT alleles was determined by a >80% reduction of the WT alleles, noted by the absence of the G nucleotide at position 515 (indicated by asterisk) for the *Trp53*<sup>wm-R172H/+</sup> mice and the C nucleotides at position of 733 and 735 (indicated by arrows) for the *Trp53*<sup>wm-R245W/+</sup> mice, respectively. “WT alleles retained” was determined by a <20% reduction of the WT alleles and “some WT alleles retained”, 20-80% reduction of the WT alleles. IR,  $\gamma$ -radiation.

Supplementary Figure 4

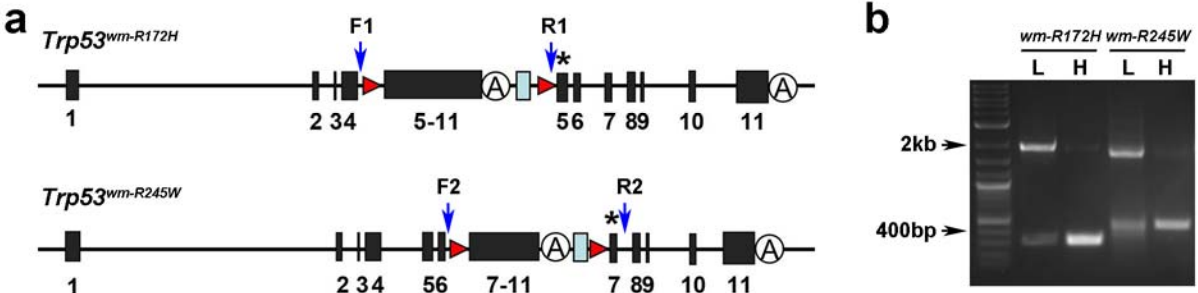

**Supplementary Figure 4** Comparing the recombination of *Trp53<sup>wm-R172H</sup>* and *Trp53<sup>wm-R245W</sup>* alleles

- a.** Schematic representation of the *Trp53<sup>wm-R172H</sup>* and *Trp53<sup>wm-R245W</sup>* alleles. The priming positions of the pair of primers (F1/R1 and F2/R2) used for identifying allele recombination are indicated by blue arrows.
- b.** PCR with primers indicated in panel (a) produced DNA products for un-recombined (upper bands, close to 2kb) and recombined (lower bands, close to 400bp) *Trp53<sup>wm-R172H</sup>* and *Trp53<sup>wm-R245W</sup>* alleles. *wm-R172H*, mammary gland genomic DNA from *Trp53<sup>wm-R172H/wm-R172H</sup>* mice subjected to intraductal injection of Ad-Cre; *wm-R245W*, mammary gland genomic DNA from *Trp53<sup>wm-R245W/wm-R245W</sup>* mice subjected to intraductal injection of Ad-Cre. L, low dose of Ad-Cre; H, high dose of Ad-Cre.

Supplementary Figure 5

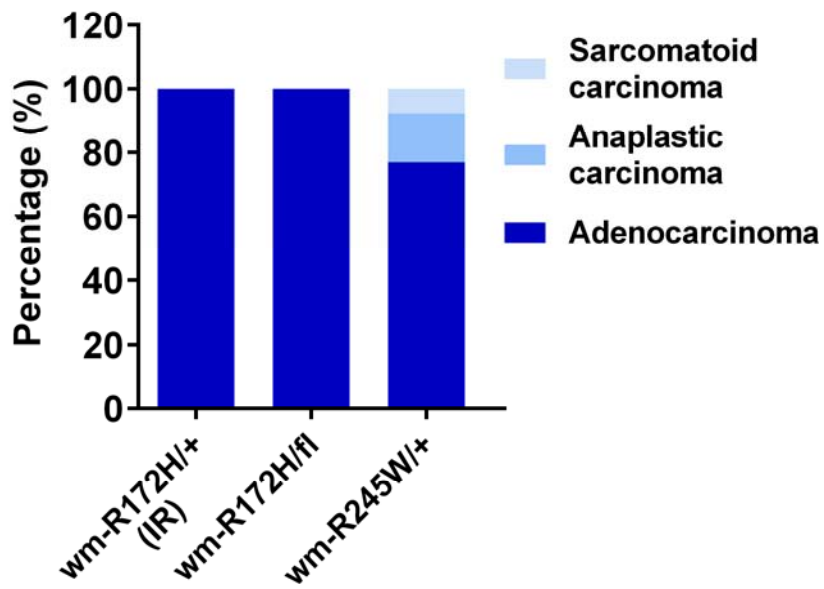

Supplementary Figure 5 Pathological subtypes of mammary tumors from Ad-Cre injected mice of various *Trp53* genotypes. IR,  $\gamma$ -radiation.

Supplementary Figure 6

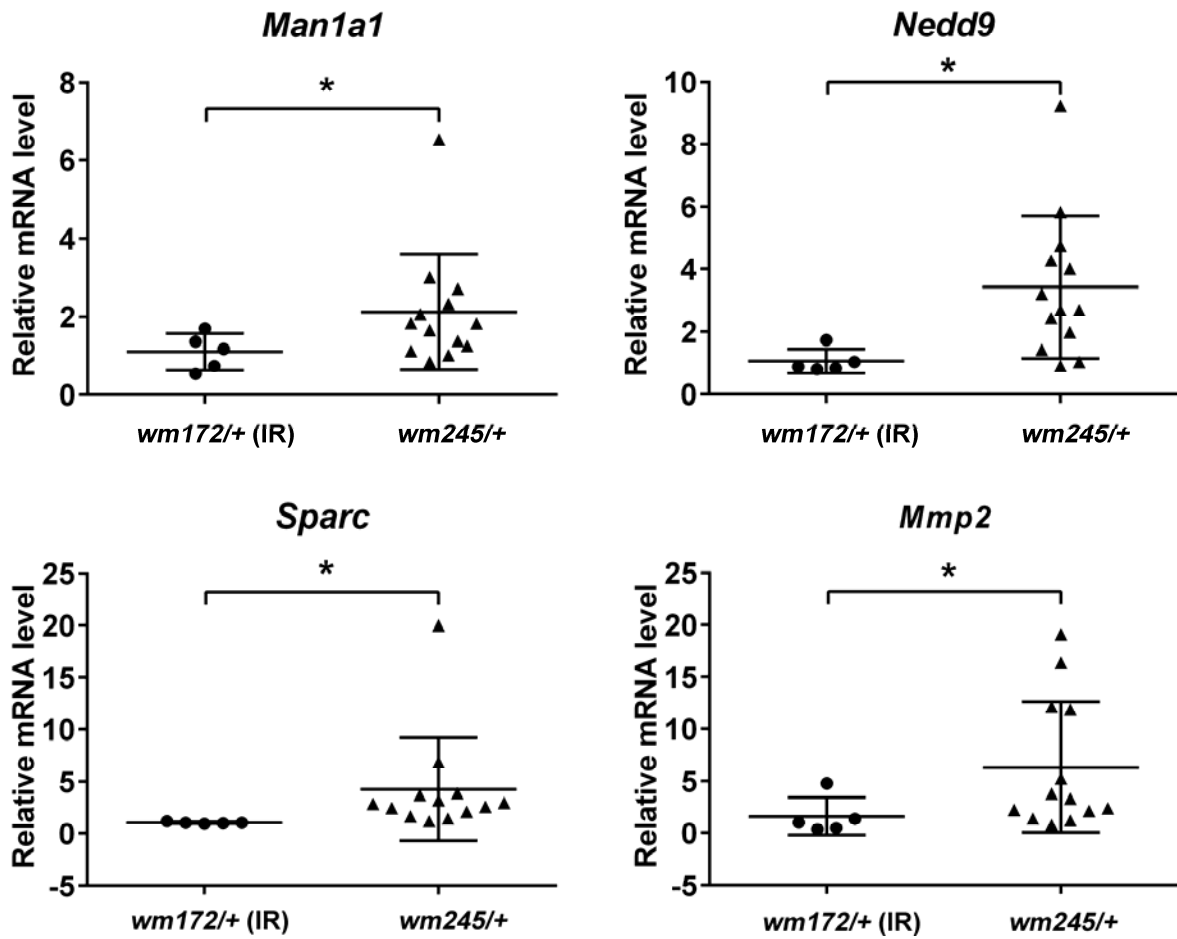

**Supplementary Figure 6** RT-qPCR analysis for *Man1a1*, *Nedd9*, *Sparc* and *Mmp2*, in Trp53R245W driven mammary tumors compared to Trp53R172H mammary tumors. *wm172/+*, *Trp53<sup>wm-R172H/+</sup>*; *wm245/+*, *Trp53<sup>wm-R245W/+</sup>*; IR,  $\gamma$ -radiation. Error bars, s.d. \*  $p < 0.05$  (t-test)



# Supplementary Figure 7

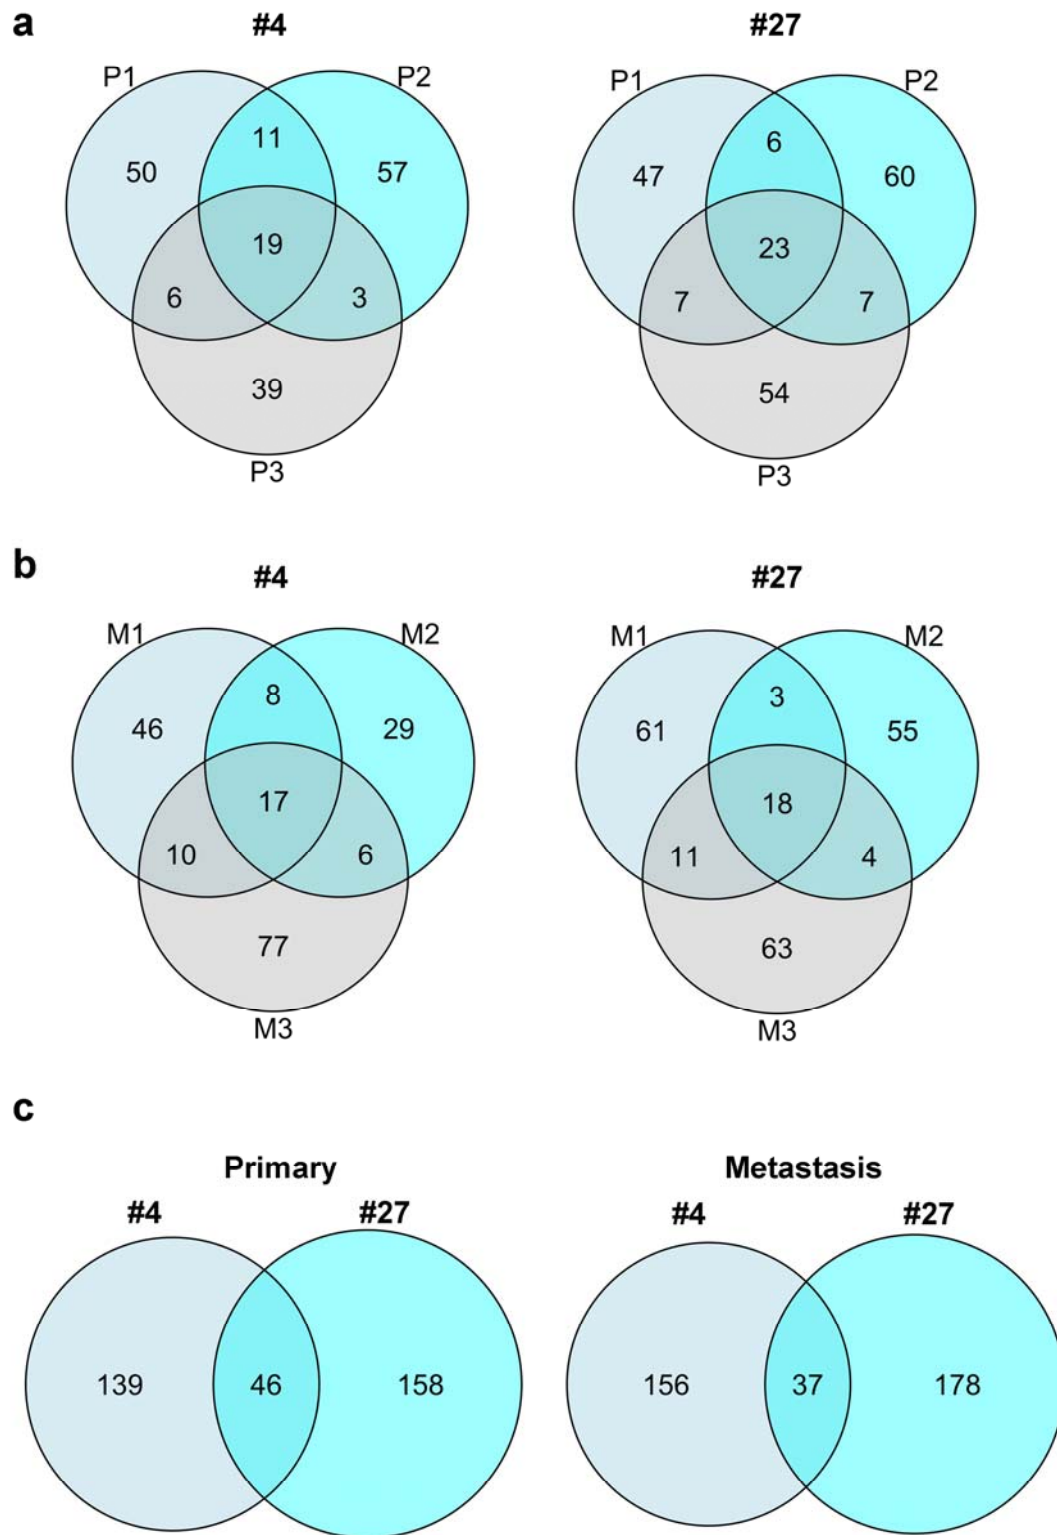

**Supplementary Figure 7** Intra- and inter-tumor heterogeneity in mammary tumors driven by somatic *Trp53R245W* mutations, as revealed by multi-region exon sequencing.

- a. Venn diagrams depicting the overlap of the identified mutations among three physically separated regions of primary tumors (P1-P3) from mouse #4 and #27.
- b. Venn diagrams depicting the overlap of the identified mutations among three metastatic clones (M1-M3) in mouse #4 and #27.
- c. Venn diagrams depicting the overlap of the identified mutations between #4 and #27 primary tumors (P) and metastases (M).

Supplementary Fig. 8

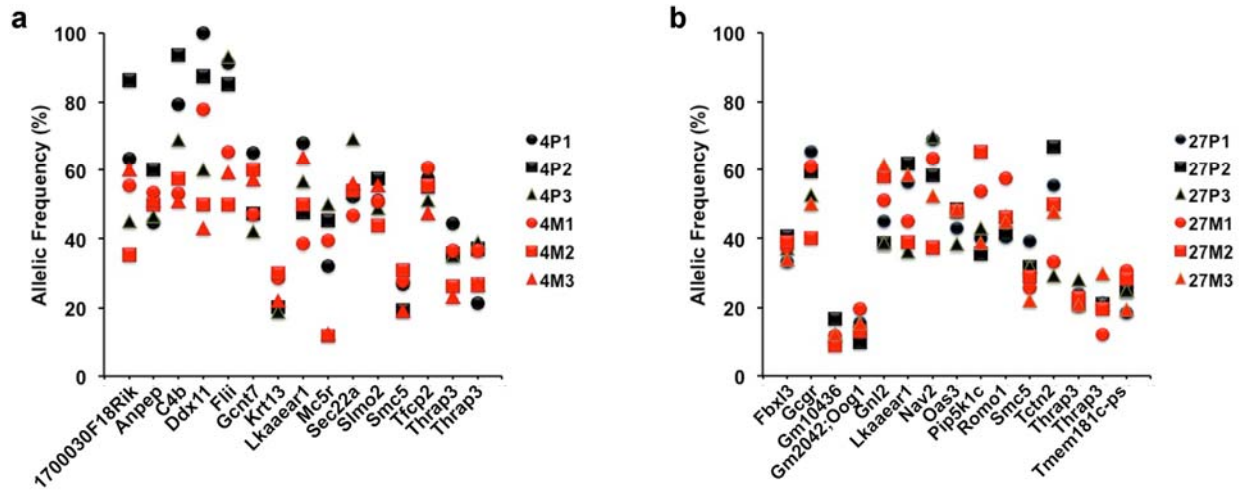

**Supplementary Figure 8** Allelic frequencies of gene alterations that are present in all six samples (P1-P3 and M1-M3) in mouse #4 (a) and #27 (b).

**Supplementary Fig. 9**

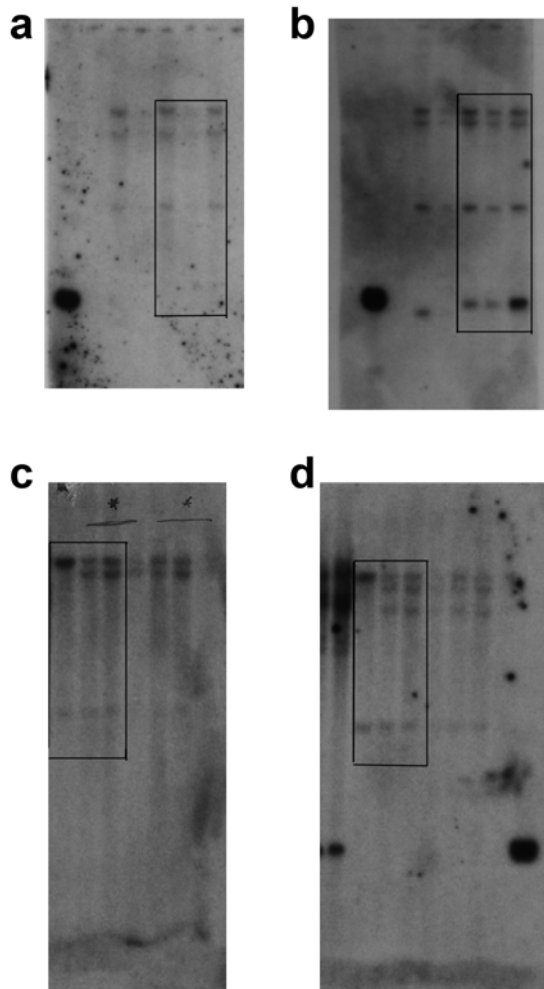

**Supplementary Figure 9** Southern blots of cropped blots in the Supplementary Figure 1.  
**a and b.** Southern blots of cropped blots in the Supplementary Figure 1c.  
**c and d.** Southern blots of cropped blots in the Supplementary Figure 1d.

**Supplementary Fig. 10**

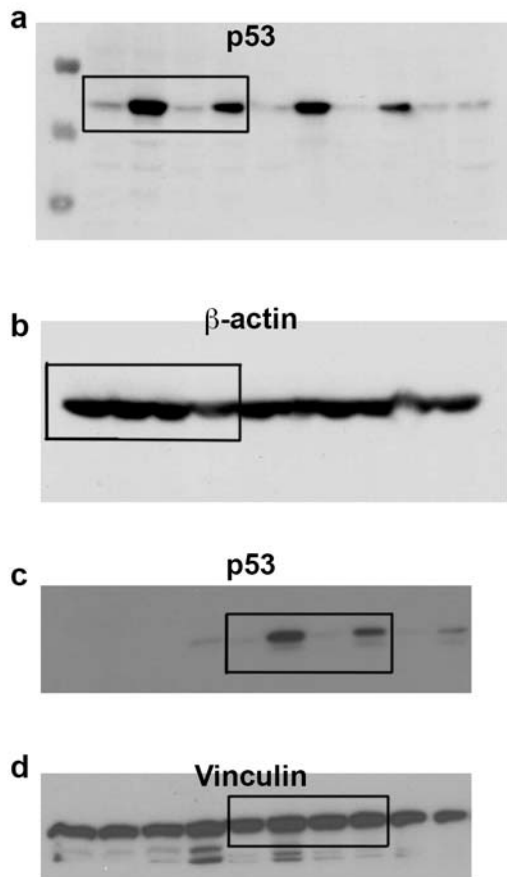

**Supplementary Figure 10** Immunoblots of cropped blots in Figure 1b.

**a and b.** immunoblots of cropped blots for characterizing the *Trp53<sup>wm-R172H</sup>* allele as shown in Figure 1b.

**c and d.** immunoblots of cropped blots for characterizing the *Trp53<sup>wm-R245W</sup>* allele as shown in Figure 1b.
