# Supplementary material for: Somatic Trp53 mutations differentially drive breast cancer and evolution of metastases
Source: PubMed Central journal article supplement (PMC6160420; doi:10.1038/s41467-018-06146-9), 2018-09-27
Supplement: 41467_2018_6146_MOESM2_ESM.pdf [file 41467_2018_6146_MOESM2_ESM.pdf]

## Supplementary Data 1

Spreadsheet of genes with various alterations identified in any of the three physically separated regions of primary tumors (P1-P3) or associated metastatic clones (M1-M3) from each of two Trp53<sup>wm-R245W/+</sup> mice (#4 and #27), subjected to high dose Ad-Cre intraductal injection. Column A, names of genes with alterations that have been identified (indicated by X in Columns B-M) in at least one region of P1-P3 or M1-M3 from #4 or #27 mouse. Columns N-Y, specific types of gene alterations. INS, insertion; DEL, deletion; NS, non-synonymous substitution; ncRNA\_exonic, alteration in non-coding RNA exons; Splicing, alteration in splice junction; MultipleAlt, multiple alterations.
